# Supplementary material for: Cross-linked poly(hydroxy imide) gate-insulating materials for low-temperature processing of organic thin-film transistors
Source: Royal Society of Chemistry journal article supplement (doi:10.1039/c8tc02634c), 2018-01-01
Supplement: c8tc02634c1.pdf [file c8tc02634c1.pdf]

Electronic Supplementary Information

**Cross-linked poly(hydroxy imide) gate-insulating materials for low-temperature processing of organic thin-film transistors**

Joo-Young Kim,<sup>ab</sup> Ji Whan Kim,<sup>a</sup> Eun Kyung Lee,<sup>a</sup> Jeong-Il Park,<sup>a</sup> Bang-Lin Lee,<sup>a</sup>

Young-Nam Kwon<sup>c</sup>, Sunjung Byun<sup>c</sup>, Myung-Sup Jung<sup>\*d</sup> and Jang-Joo Kim<sup>\*b</sup>

a. Material Research Center, SAIT, Samsung Electronics, Suwon, Gyeonggi-do 16678, Republic of Korea

b. Department of Materials Science and Engineering, Seoul National University, Seoul 08826, Republic of Korea

c. Platform Technology Lab, SAIT, Samsung Electronics, Suwon, Gyeonggi-do 16678, Republic of Korea

d. INNOX Corporation R&D Center, Asan, Chungcheongnam-do 31409, Republic of Korea

**Corresponding Author**

\*Jang-Joo Kim (jjkim@snu.ac.kr), Myung-Sup Jung (msjung22@innocorp.com)

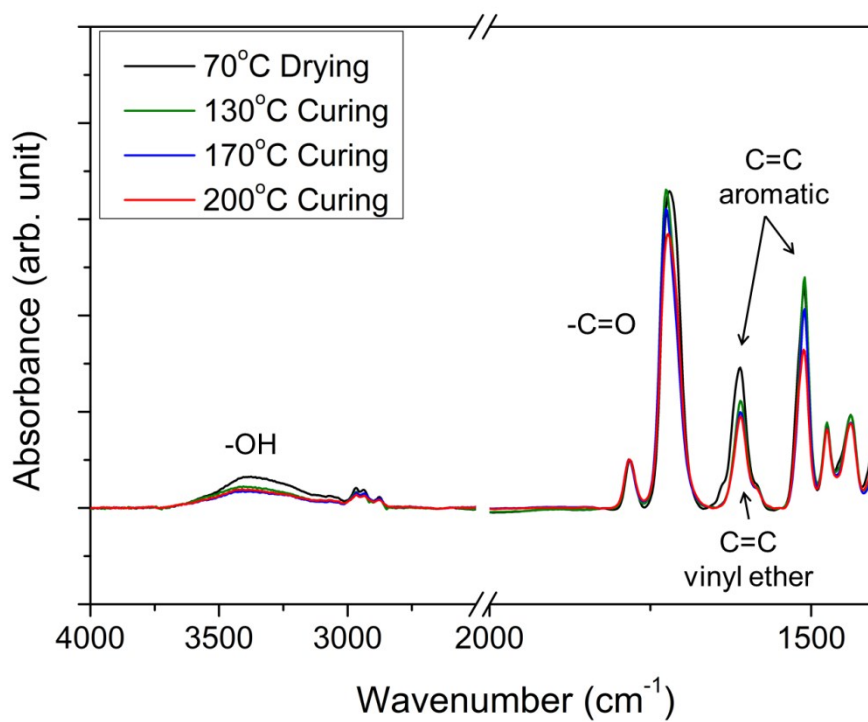

**Figure S1** Comparison of FT-IR spectra of PHI 100 thin films cured at different temperatures

**Table S1** The crosslinking densities estimated from the absorption reduction of the OH group

| Curing temperature | Cross-linking density |
|--------------------|-----------------------|
| 130°C              | 28 %                  |
| 170°C              | 31 %                  |
| 200°C              | 30 %                  |

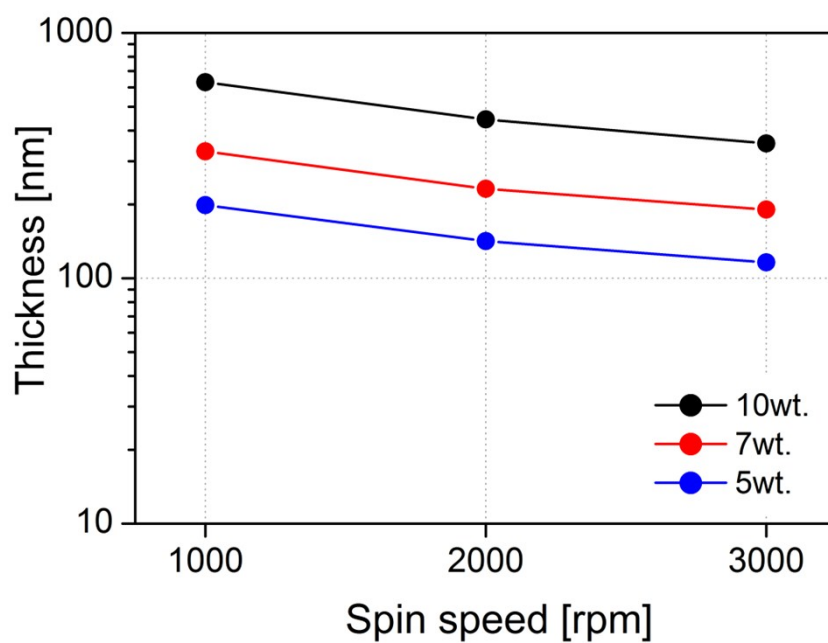

**Figure S2** Thickness variation of PHI 100 thin films with tunable parameters ; solid content and spin speed

**Table S2** Solid content and spin speed conditions for the deposition of PHI 100 thin films

| Solid content | Spin speed [rpm] | Film thickness [nm] |
|---------------|------------------|---------------------|
| 10 wt.%       | 1,650            | 500                 |
|               | 2,450            | 400                 |
| 7 wt.%        | 1,230            | 300                 |
|               | 2,700            | 200                 |
| 5 wt.%        | 3,620            | 100                 |

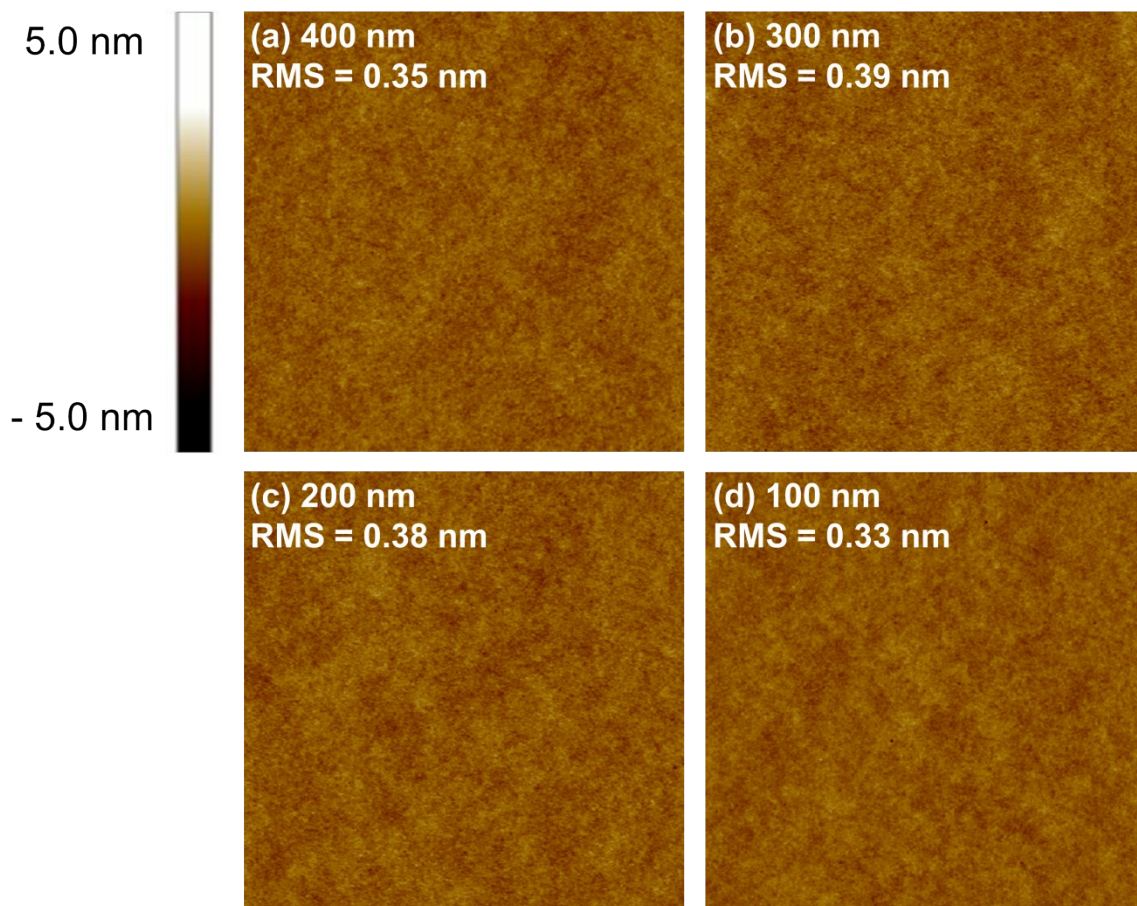

**Figure S3** Surface roughness of PHI 100 thin films by AFM (5  $\mu\text{m}$  scale);  
(a) 400 nm – thick film, (b) 300 nm – thick film, (c) 200 nm – thick film, (d) 100 nm – thick film

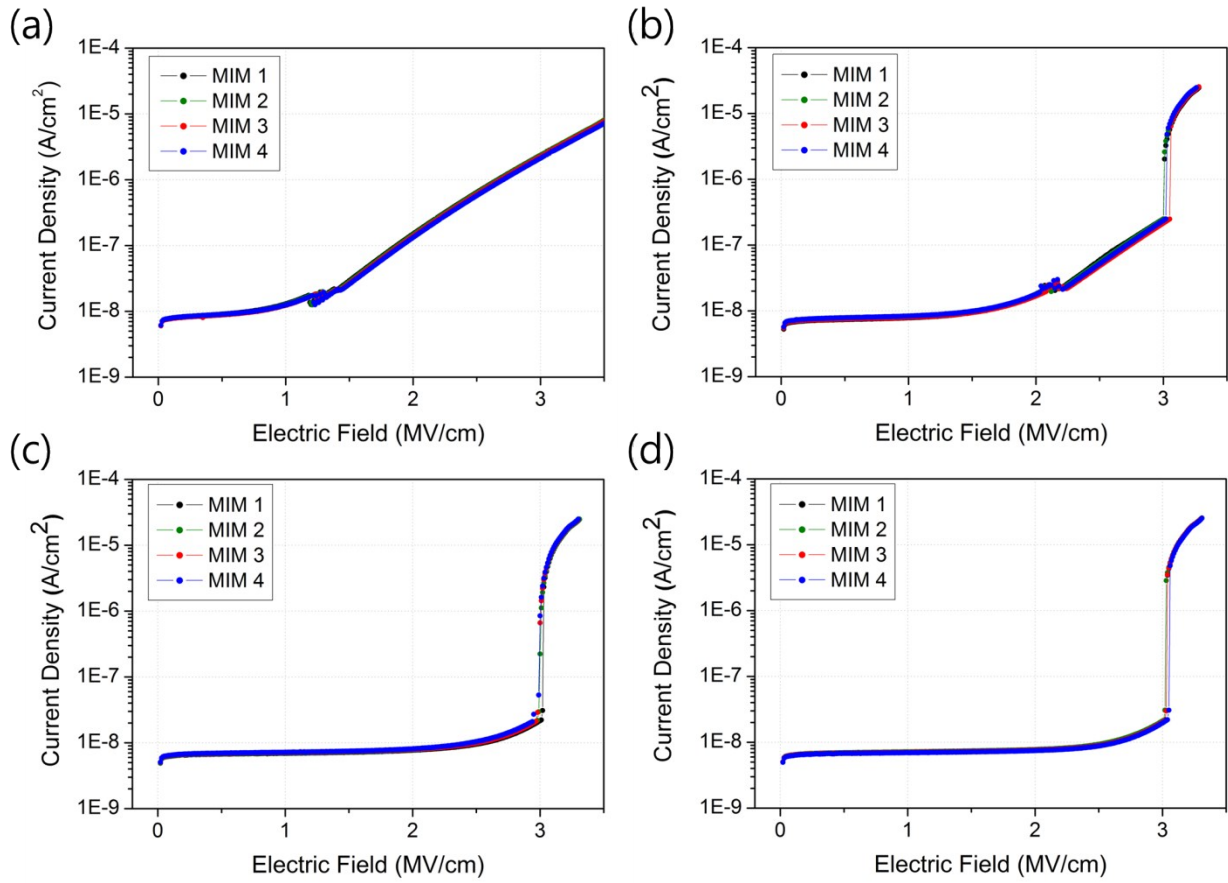

**Figure S4** Leakage current densities of MIM structures fabricated from (a) PHI 0, (b) PHI 33, (c) PHI 67, (d) PHI 100

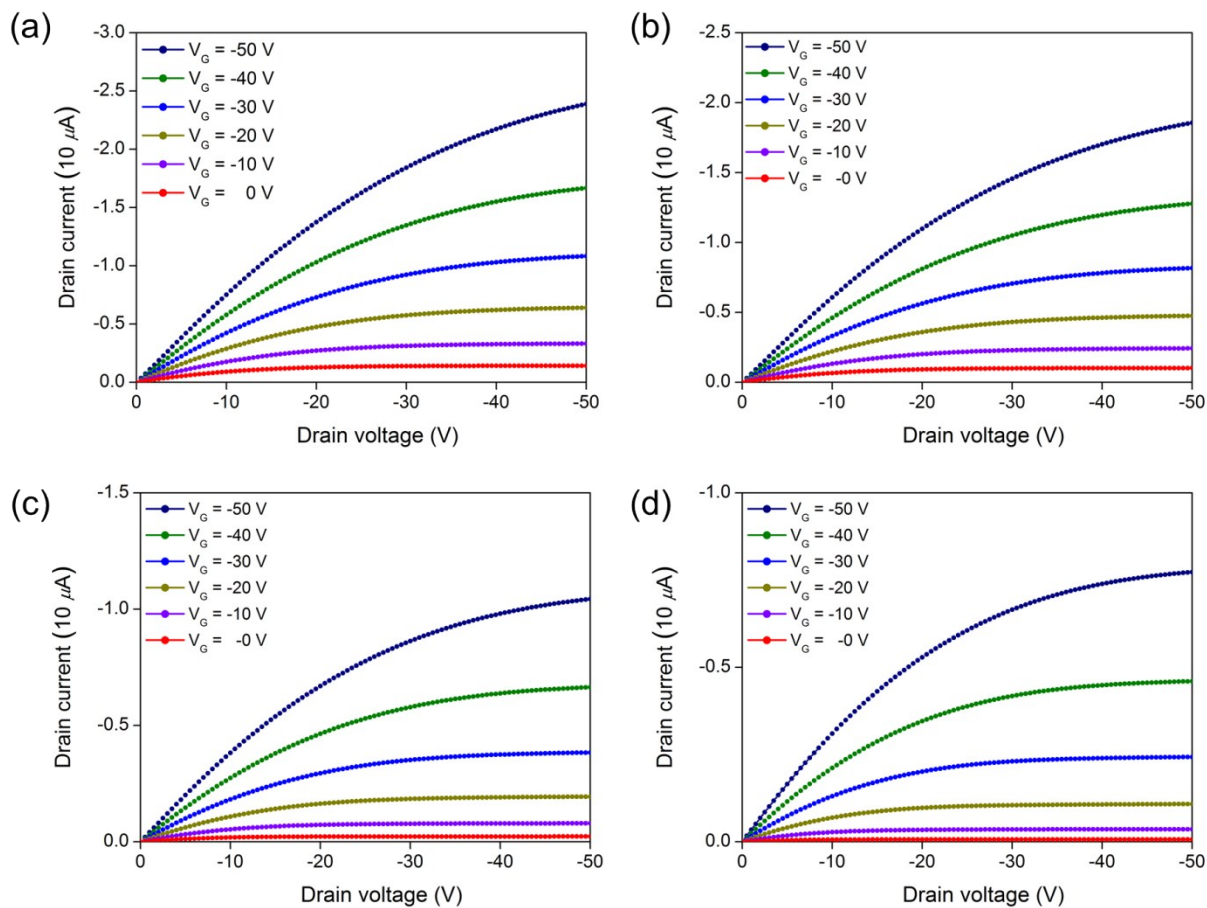

**Figure S5** Output characteristics of pentacene TFTs using PHI as gate-insulating layers.

(a) PHI 0 (b) PHI 33 (c) PHI 67 (d) PHI 100

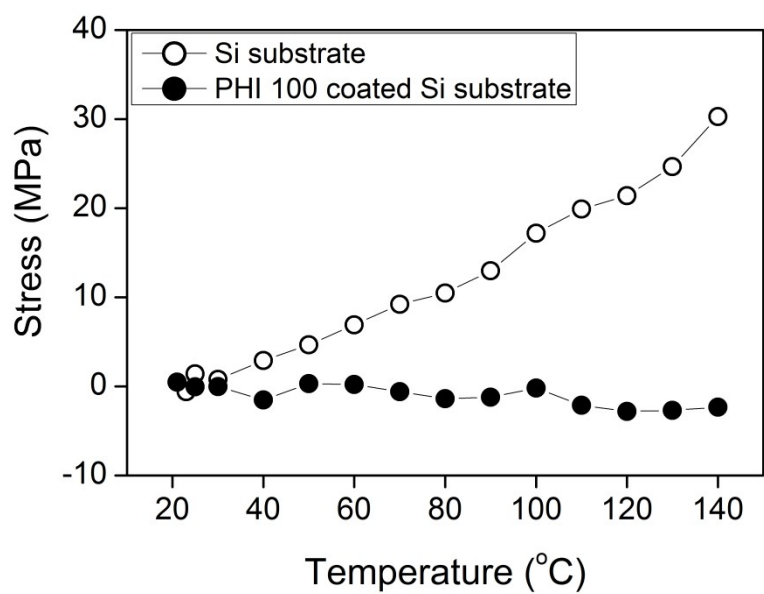

**Figure S6** Stress changes with temperature for 8 inch Si substrate and 500 nm-thick PHI 100 thin film deposited on it
